# Supplementary material
Source: PubMed Central journal article supplement (PMC5277528)
Supplement: JCM.02087-16_zjm999095359s1.pdf [file JCM.02087-16_zjm999095359s1.pdf]

**TABLE S1:** Features of the *Mycobacterium intracellulare* isolates included in this study

| Isolate ID <sup>1</sup> | Collection Month | BDQ Status         | <i>atpE</i> Sequence | AtpE Sequence | <i>mmpT5</i> Allele | <i>mmpT5</i> Nucleotide Position <sup>2</sup> |    |    |    |     |     |     |         |         |     |     |     |     |     |     |     |     |     |     |
|-------------------------|------------------|--------------------|----------------------|---------------|---------------------|-----------------------------------------------|----|----|----|-----|-----|-----|---------|---------|-----|-----|-----|-----|-----|-----|-----|-----|-----|-----|
|                         |                  |                    |                      |               |                     | 56                                            | 67 | 72 | 74 | 104 | 129 | 137 | 196/197 | 311/312 | 378 | 429 | 450 | 471 | 484 | 504 | 522 | 528 | 529 | 582 |
| ATCC 13950 <sup>T</sup> |                  | No Treatment       | WT                   | WT            | 1.1                 | T                                             | G  | A  | G  | T   | A   | T   | -       | -       | G   | C   | C   | G   | G   | G   | C   | G   | G   |     |
| BDQ-1A                  | 2011-12          | Pre-Treatment      | WT                   | WT            | 3.1                 | T                                             | G  | A  | G  | T   | A   | T   | -       | -       | G   | C   | C   | A   | G   | G   | T   | G   | G   |     |
| BDQ-1B                  | 2014-02          | On BDQ (5 mos)     | WT                   | WT            | 3.2                 | T                                             | G  | A  | G  | T   | A   | T   | C       | -       | G   | C   | C   | A   | G   | G   | T   | G   | G   |     |
| BDQ-1C                  | 2014-05          | On BDQ (8 mos)     | WT                   | WT            | 3.2                 | T                                             | G  | A  | G  | T   | A   | T   | C       | -       | G   | C   | C   | A   | G   | G   | T   | G   | G   |     |
| BDQ-1D                  | 2014-05          | On BDQ (8.5 mos)   | WT                   | WT            | 3.2                 | T                                             | G  | A  | G  | T   | A   | T   | C       | -       | G   | C   | C   | A   | G   | G   | T   | G   | G   |     |
| BDQ-1E                  | 2014-08          | On BDQ (11 mos)    | WT                   | WT            | 3.2                 | T                                             | G  | A  | G  | T   | A   | T   | C       | -       | G   | C   | C   | A   | G   | G   | T   | G   | G   |     |
| BDQ-1F                  | 2015-09          | Post BDQ (3 mos)   | G221→C               | Ala65→Pro     | 3.3                 | T                                             | G  | A  | C  | T   | A   | T   | -       | -       | G   | C   | C   | A   | G   | G   | T   | G   | G   |     |
| BDQ-1G                  | 2015-12          | Post BDQ (7 mos)   | G221→C               | Ala65→Pro     | 3.3                 | T                                             | G  | A  | C  | T   | A   | T   | -       | -       | G   | C   | C   | A   | G   | G   | T   | G   | G   |     |
| BDQ-2A                  | 2011-10          | Pre-Treatment      | WT                   | WT            | 7.1                 | T                                             | G  | G  | G  | T   | A   | T   | -       | -       | G   | T   | C   | G   | G   | A   | T   | G   | A   |     |
| BDQ-2B                  | 2014-02          | On BDQ (3 mos)     | WT                   | WT            | 7.2                 | T                                             | G  | G  | G  | T   | A   | G   | -       | -       | G   | T   | C   | G   | G   | A   | T   | G   | A   |     |
| BDQ-2C                  | 2014-08          | On BDQ (9 mos)     | WT                   | WT            | 7.2                 | T                                             | G  | G  | G  | T   | A   | G   | -       | -       | G   | T   | C   | G   | G   | A   | T   | G   | A   |     |
| BDQ-2D                  | 2015-02          | Post BDQ (6 mos)   | WT                   | WT            | 7.2                 | T                                             | G  | G  | G  | T   | A   | G   | -       | -       | G   | T   | C   | G   | G   | A   | T   | G   | A   |     |
| BDQ-2E                  | 2016-01          | Post BDQ (18 mos)  | WT                   | WT            | 7.2                 | T                                             | G  | G  | G  | T   | A   | G   | -       | -       | G   | T   | C   | G   | G   | A   | T   | G   | A   |     |
| BDQ-3A                  | 2013-04          | Pre-Treatment      | WT                   | WT            | 5.1                 | T                                             | G  | A  | G  | T   | A   | T   | -       | -       | G   | C   | C   | A   | G   | G   | T   | A   | G   |     |
| BDQ-3B                  | 2014-02          | Pre-Treatment      | WT                   | WT            | 5.1                 | T                                             | G  | A  | G  | T   | A   | T   | -       | -       | G   | C   | C   | A   | G   | G   | T   | A   | G   |     |
| BDQ-3C                  | 2015-01          | On BDQ (6 mos)     | WT                   | WT            | 5.x                 | T                                             | S  | A  | G  | T   | A   | T   | -       | -       | G   | C   | C   | A   | G   | G   | T   | A   | G   |     |
| BDQ-3D                  | 2015-04          | On BDQ (8 mos)     | WT                   | WT            | 5.2                 | T                                             | C  | A  | G  | T   | A   | T   | -       | -       | G   | C   | C   | A   | G   | G   | T   | A   | G   |     |
| BDQ-3E                  | 2015-05          | On BDQ (9 mos)     | WT                   | WT            | 5.2                 | T                                             | C  | A  | G  | T   | A   | T   | -       | -       | G   | C   | C   | A   | G   | G   | T   | A   | G   |     |
| BDQ-3F                  | 2015-06          | On BDQ (10 mos)    | WT                   | WT            | 5.2                 | T                                             | C  | A  | G  | T   | A   | T   | -       | -       | G   | C   | C   | A   | G   | G   | T   | A   | G   |     |
| BDQ-3G                  | 2015-07          | On BDQ (11 mos)    | WT                   | WT            | 5.2                 | T                                             | C  | A  | G  | T   | A   | T   | -       | -       | G   | C   | C   | A   | G   | G   | T   | A   | G   |     |
| BDQ-3H                  | 2015-11          | On BDQ (15 mos)    | WT                   | WT            | 5.1                 | T                                             | G  | A  | G  | T   | A   | T   | -       | -       | G   | C   | C   | A   | G   | G   | T   | A   | G   |     |
| BDQ-4A                  | 2014-10          | Pre-Treatment      | WT                   | WT            | 4.1                 | T                                             | G  | A  | G  | T   | G   | T   | -       | -       | G   | C   | C   | A   | G   | G   | T   | G   | G   |     |
| BDQ-4B                  |                  | On BDQ (2.5 mos)   | WT                   | WT            | 4.1                 | T                                             | G  | A  | G  | T   | G   | T   | -       | -       | G   | C   | C   | A   | G   | G   | T   | G   | G   |     |
| BDQ-4C                  | 2015-08          | On BDQ (4.5 mos)   | WT                   | WT            | 4.2                 | T                                             | G  | A  | G  | T   | G   | T   | -       | C       | G   | C   | C   | A   | G   | G   | T   | G   | ?   |     |
| BDQ-4D                  |                  | On BDQ (9 mos)     | WT                   | WT            | 4.2                 | T                                             | G  | A  | G  | T   | G   | T   | -       | C       | G   | C   | C   | A   | G   | G   | T   | G   | ?   |     |
| BDQ-4E                  |                  |                    | WT                   | WT            | 4.1                 | T                                             | G  | A  | G  | T   | G   | T   | -       | -       | G   | C   | C   | A   | G   | G   | T   | G   | G   |     |
| BDQ-5A                  | 2012-12          | Pre-Treatment      | WT                   | WT            | 1.1                 | T                                             | G  | A  | G  | T   | A   | T   | -       | -       | G   | C   | C   | G   | G   | G   | C   | G   | G   |     |
| BDQ-5B                  | 2014-01          | On BDQ (4 mos)     | WT                   | WT            | 1.1                 | T                                             | G  | A  | G  | T   | A   | T   | -       | -       | G   | C   | C   | G   | G   | G   | C   | G   | G   |     |
| BDQ-5C                  | 2014-05          | On BDQ (8 mos)     | WT                   | WT            | 1.2                 | T                                             | G  | A  | G  | T   | A   | T   | -       | -       | G   | C   | C   | G   | C   | G   | C   | G   | G   |     |
| BDQ-5D                  | 2014-12          | On BDQ (15 mos)    | WT                   | WT            | 1.2                 | T                                             | G  | A  | G  | T   | A   | T   | -       | -       | G   | C   | C   | G   | C   | G   | C   | G   | G   |     |
| BDQ-5E                  | 2015-08          | On BDQ (23 mos)    | G221→C               | Ala65→Pro     | 1.1                 | T                                             | G  | A  | G  | T   | A   | T   | -       | -       | G   | C   | C   | G   | G   | G   | C   | G   | G   |     |
| BDQ-5F                  |                  | On BDQ (28 mos)    | G221→C               | Ala65→Pro     | 1.1                 | T                                             | G  | A  | G  | T   | A   | T   | -       | -       | G   | C   | C   | G   | G   | G   | C   | G   | G   |     |
| BDQ-5G                  | 2016-03          | On BDQ (30 mos)    | nd                   | nd            | 1.1                 | T                                             | G  | A  | G  | T   | A   | T   | -       | -       | G   | C   | C   | G   | G   | G   | C   | G   | G   |     |
| BDQ-6A                  | 2014-02          | Pre-Treatment      | WT                   | WT            | 5.1                 | T                                             | G  | A  | G  | T   | A   | T   | -       | -       | G   | C   | C   | A   | G   | G   | T   | A   | G   |     |
| BDQ-6B                  | 2015-01          | On BDQ (7 mos)     | WT                   | WT            | 5.3                 | G                                             | G  | A  | G  | T   | A   | T   | -       | -       | G   | C   | C   | A   | G   | G   | T   | A   | G   |     |
| BDQ-6C                  |                  | Post BDQ (4.5 mos) | WT                   | WT            | 5.4                 | T                                             | G  | A  | G  | G   | A   | T   | -       | -       | G   | C   | C   | A   | G   | G   | T   | A   | G   |     |
| BDQ-6D                  | 2015-07          | Post BDQ (6 mos)   | WT                   | WT            | 5.4                 | T                                             | G  | A  | G  | G   | A   | T   | -       | -       | G   | C   | C   | A   | G   | G   | T   | A   | G   |     |
| BDQ-6E                  |                  | Post BDQ (8.5 mos) | WT                   | WT            | 5.1                 | T                                             | G  | A  | G  | T   | A   | T   | -       | -       | G   | C   | C   | A   | G   | G   | T   | A   | G   |     |
| BDQ-7A                  | 2012-12          | Pre-Treatment      | WT                   | WT            | 7.1                 | T                                             | G  | G  | G  | T   | A   | T   | -       | -       | G   | T   | C   | G   | G   | A   | T   | G   | A   |     |
| BDQ-7B                  | 2014-02          | On BDQ (2 mos)     | WT                   | WT            | 7.1                 | T                                             | G  | G  | G  | T   | A   | T   | -       | -       | G   | T   | C   | G   | G   | A   | T   | G   | A   |     |
| BDQ-7C                  | 2015-06          | Post BDQ (5 mos)   | WT                   | WT            | 7.3                 | T                                             | G  | G  | G  | T   | A   | T   | -       | C       | G   | T   | C   | G   | G   | A   | T   | G   | A   |     |
| BDQ-7D                  | 2015-06          | Post BDQ (5 mos)   | WT                   | WT            | 7.3                 | T                                             | G  | G  | G  | T   | A   | T   | -       | C       | G   | T   | C   | G   | G   | A   | T   | G   | A   |     |
| BDQ-7E                  | 2015-11          | Post BDQ (10 mos)  | WT                   | WT            | 7.3                 | T                                             | G  | G  | G  | T   | A   | T   | -       | C       | G   | T   | C   | G   | G   | A   | T   | G   | A   |     |
| BDQ-8A                  | 2014-11          | Pre-Treatment      | WT                   | WT            | 4.1                 | T                                             | G  | A  | G  | T   | G   | T   | -       | -       | G   | C   | C   | A   | G   | G   | T   | G   | G   |     |
| BDQ-8B                  | 2014-12          | On BDQ (1 mo)      | WT                   | WT            | 4.1                 | T                                             | G  | A  | G  | T   | G   | T   | -       | -       | G   | C   | C   | A   | G   | G   | T   | G   | G   |     |
| BDQ-9A                  | 2014-09          | On BDQ (1 mo)      | WT                   | WT            | 2.1                 | T                                             | G  | A  | G  | T   | A   | T   | -       | -       | G   | C   | C   | G   | G   | G   | T   | G   | G   |     |
| BDQ-9B                  | 2015-01          | On BDQ (11 mos)    | WT                   | WT            | 6.1                 | T                                             | G  | G  | G  | T   | A   | T   | -       | -       | G   | T   | T   | G   | G   | T   | G   | G   | G   |     |
| BDQ-10A                 | 2015-07          | Pre-Treatment      | WT                   | WT            | 1.1                 | T                                             | G  | A  | G  | T   | A   | T   | -       | -       | G   | C   | C   | G   | G   | G   | C   | G   | G   |     |
| BDQ-10B                 | 2015-10          |                    | WT                   | WT            | 1.1                 | T                                             | G  | A  | G  | T   | A   | T   | -       | -       | G   | C   | C   | G   | G   | G   | C   | G   | G   |     |
| BDQ-11A                 | 2015-08          | Pre-Treatment      | WT                   | WT            | 5.1                 | T                                             | G  | A  | G  | T   | A   | T   | -       | -       | G   | C   | C   | A   | G   | G   | T   | A   | G   |     |
| BDQ-12A                 | 2015-02          | Pre-Treatment      | WT                   | WT            | 8.1                 | T                                             | G  | G  | G  | T   | A   | T   | -       | -       | A   | C   | C   | G   | G   | A   | G   | C   | G   | G   |

<sup>1</sup> Isolates IDs are assigned sequentially (i.e. BDQ-1A is the first isolate from Patient 1; BDQ-1B is the second isolate from Patient 1, etc). ATCC 13950<sup>T</sup> sequences were determined by analysing a stock culture maintained at UTHSCT Note: the UTHSCT ATCC 13950<sup>T</sup> *atpE* and *mmpT5* sequences are identical to ATCC 13950<sup>T</sup> sequences deposited as GenBank entry GCA\_000172115.1, but not ATCC 13950<sup>T</sup> sequences deposited as accession number CP003322.

<sup>2</sup> For additional information regarding the nucleotide and amino acid changes associated with each *mmpT5* allele, see TABLE 3
